# Supplementary material for: Identification of Unique Gene Expression Profile in Children with Regressive Autism Spectrum Disorder (ASD) and Ileocolitis
Source: PLoS One. 2013 Mar 8;8(3):e58058. doi: 10.1371/journal.pone.0058058 (PMC3592909; doi:10.1371/journal.pone.0058058)
Supplement: Table S1 — Demographic and medical history data for ASDGI cases. (XLSX) [file pone.0058058.s001.xlsx]

## Sheet: Sheet1
ASD-GI
	Age	Gender	Diagnosis	Special Diet?	Currently on medications?	Nutritional Supplements at Time of Biopsy
1	3 y 3 m	M	ASD	GFCF	subcutaneous MB-12	None
2	4 y 10 m	M	Autism	GFCF, Soy Free	Miralax	multi minerals and vitamins
3	5 y 8 m	M	Autism	GFCF, Corn Free	Bethanechol	Aloe Vera Juice, Cod Liver Oil, Multi-Vitamin, P5P, Vitamin C,
						Yeast Aid, Candex, Phenol Assist, juice concentrate, Vitamin B-12
4	7 y 8 m	M	Autism	GFCF, SCD	IVIG, IV Secretin	Milk of Magnesia, Mineral Oil, Glutathione
5	3 y 7 m	M	Autism	SCD	None	Methylcobalamine, N-acetylcysteine, multivitamins, trimethylglycine,
						methyl B12, Phenol Assist, Phenol Assist Companion, Fish Oil, Cod Liver Oil,
						CoQ10, Vitamin E, Vitamin C, Calcium-Magnesium, Glutathione
6	2 y 10 m	M	ASD	GFCF	subcutaneous MB12	DHA Junior, Flax Oil, Vitamin C
7	6 y 5 m	M	ASD	GFCF, Soy Free, Dye Free, Sugar Free, SCD	Amitriptyline, Hyacosamine, Allegra	subcutaneous MB12, N-acetylcyteine, cod liver oil, Omega-3, Magnesium
8	10y 11 m	M	ASD	GFCF	Lexapro	None
9	4 y 3 m	F	ASD	GFCF/SCD, Nut Free, Honey Free	Humatrope, subcutaneous MB12,	None
					DMPS (IV), IV N-acetylcysteine and Folinic acid,
					IV Secretin (porcine), IVIG
10	5 y 11 m	M	ASD	Casein Free	Zyrtec	None
11	5 y 3 m	M	ASD	SCD	subcutaneous MB12, transdermal DMPS	Cod Liver Oil
12	3 y 7 m	M	ASD	Casein Free, Wheat Free, Barley Free, Rye Free	None	multivitamins and minerals, Calcium, Magnesium
13	4 y 4 m	F	ASD	GFCF, Soy Free, Dye Free	IVIG, subcutaneous MB12	wheat dextrin soluble fiber
14	3 y 1 m	M	ASD	GFCF	subcutaneous MB12, transdermal DMPS	Multi minerals and vitamins, Cod Liver Oil, Glutathione, Zinc
15	8 y 5 m	M	ASD	Casein Free, Soy Free	Clonidine (p.r.n.), Glycolax	None
16	7 y 8 m	M	Autism	GFCF	None	None
17	5 y 7 m	M	ASD	GFCF	None	None
18	3 y 10 m	M	ASD	GFCF	None	None
19	3 y 9 m	M	ASD	GFCF, Soy Free	None	subcutaneous MB12, multi vitamins and minerals, Folinic Acid, Amino acids
20	4 y 4 m	M	ASD	GFCF	None	None
21	3 y 9 m	M	ASD	GFCF, Soy Free, Feingold Diet	subcutaneous MB12	None
22	4 y 1 m	M	ASD	GFCF, SCD	Clonidine (p.r.n.), subcutaneous MB12	None
23	7 y 3 m	M	Autism	High Fiber Diet, GFCF,	None	None
24	1 y 10 m	M	ASD/Apraxia	GFCF	None	cod liver oil, multivitamins and minerals, omega-3, amino acids
25	5 y 0 m	M	ASD	GFCF, Sugar Free	None	GFCF, Sugar Free
