# Supplementary material for: Identification of Unique Gene Expression Profile in Children with Regressive Autism Spectrum Disorder (ASD) and Ileocolitis
Source: PLoS One. 2013 Mar 8;8(3):e58058. doi: 10.1371/journal.pone.0058058 (PMC3592909; doi:10.1371/journal.pone.0058058)
Supplement: Table S2 — Demographic and medical history data for non-ASD controls. (XLSX) [file pone.0058058.s002.xlsx]

## Sheet: Sheet1
Control	Age	Gender	IBD Status	Currently on medications?
1	6	M		none
2	11	F		fiber, multivitamins
				Polyethylene glycol 3350 , amitriptyline
3	6	M		lisdexamfetamine dimesylate, clonidine
4	13	M		lansoprazole
5	15	M		montelukast sodium, albuterol, acetaminophen, amitriptyline
6	13	F		none
7	14	F		tacrolimus topical, amitriptyline, ondensetron, Hyoscyamine
8	11	F		none
9	11	F		Polyethylene glycol 3350 , ranitidine, levsin, prevacid, amitriptyline,
				dicyclomine, impramine
10	15	M		docusate ,Polyethylene glycol 3350 , ibuprofen, fluticasone, pantoprazole, metoprolol
11	12	F		none
12	13	M		Polyethylene glycol 3350
13	11	F		Polyethylene glycol 3350
14	16	F		Polyethylene glycol 3350
15	16	F		gabapentin, trazamine, hydrocodone, ibuprofen
Crohn's disease
1	13y10m	M	active	none
2	16	F	active	none
3	15	F	active	none
4	10	M	inactive	6-mercaptopurine
5	15	F	active	6-mercaptopurine, polyethylene glycol 3350, ferrous sulfate, tacrolimus topical
6	4y9m	F	active	multivitamin
7	17	M	active	lansoprazole, TPN, prednisone
8	12y3m	F	active	none
Ulcerative colitis
1	13	F	active	mesalamine, ferrous sulfate
2	5	F	active	Polyethylene glycol 3350
3	13	F	active	none
4	15	F	active	chlorpheniramine, dextromethorphan,phenylephrine, ibuprofen, metronidazole
5	14	F	inactive	Polyethylene glycol 3350 , mesalamine, lidocaine topical, azathioprine, mesalamine
				(suppository), VSL#3 (probiotic), prednisone, omeprazole
