# Supplementary material for: Identification of Unique Gene Expression Profile in Children with Regressive Autism Spectrum Disorder (ASD) and Ileocolitis
Source: PLoS One. 2013 Mar 8;8(3):e58058. doi: 10.1371/journal.pone.0058058 (PMC3592909; doi:10.1371/journal.pone.0058058)
Supplement: Table S3 — Gene list for 178 transcripts that were differentially-regulated in both terminal ileum and colon, exclusively in ASDGI samples. (XLSX) [file pone.0058058.s003.xlsx]

## Sheet: 178 genes + ids
			TERMINAL ILEUM				COLON
Gene Name	Gene Identifier	Ratio	Direction	adj. p-value		Ratio	Direction	adj. p-value
hypothetical protein LOC285505	AK096792	2.35	Down	0.000170314		2.33	Down	0.000907495
hypothetical LOC100133306	AK125136	2.23	Down	2.59775e-05		2.52	Down	7.6319e-05
GTP binding protein 6 (putative)	AK296003	2.48	Down	1.45535e-06		2.39	Down	9.68647e-08
actin, gamma 2, smooth muscle, enteric	AK310215	2.2	Down	0.000980159		2.87	Down	0.00148124
hypothetical protein LOC643201	BC034407	2.09	Down	0.000115769		2.14	Down	0.000417749
protein tyrosine phosphatase, receptor type, F	BC048416	2.04	Down	1.64856e-06		2.04	Down	3.49754e-06
phospholipase B1	BC065041	2.09	Down	0.000878867		2.24	Down	0.000907495
aminolevulinate, delta-, dehydratase	NM_000031	2.09	Down	1.01635e-06		2.24	Down	5.59592e-05
adenosine monophosphate deaminase 1 (isoform M)	NM_000036	3.7	Down	4.46979e-07		3.85	Down	0.000162182
arylsulfatase E (chondrodysplasia punctata 1)	NM_000047	3.08	Down	4.58441e-05		2.15	Down	0.00411893
membrane-spanning 4-domains, subfamily A, member 2 (Fc	NM_000139	2.15	Down	5.23882e-05		2.57	Down	0.000367888
fragment of IgE, high affinity I, receptor for; beta polypeptide)
transcobalamin II; macrocytic anemia	NM_000355	2.34	Down	6.00494e-05		2.58	Down	1.04309e-05
interleukin 2 receptor, alpha	NM_000417	2.63	Up	2.93889e-06		4.58	Up	9.00761e-07
complement component 8, gamma polypeptide	NM_000606	2.13	Down	0.000170314		2.01	Down	0.000417749
4-aminobutyrate aminotransferase	NM_000663	2.21	Down	1.64856e-06		2.13	Down	5.59592e-05
aldehyde dehydrogenase 3 family, memberA1	NM_000691	2.55	Down	3.97144e-06		2.53	Down	0.000907495
cholinergic receptor, muscarinic 1	NM_000738	3.34	Down	2.24435e-05		2.87	Down	3.49754e-06
similar to growth arrest-specific 6; growth arrest-specific 6	NM_000820	2.17	Down	1.15527e-06		2.12	Down	4.08352e-05
glycoprotein M6B	NM_001001995	2.08	Down	1.95284e-05		2.22	Down	6.03295e-06
chromosome Y open reading frame 15A	NM_001005852	8.5	Up	0.0261894		9.71	Up	0.0260101
ribosomal protein S4, Y-linked 1	NM_001008	43.3	Up	0.00588955		56.76	Up	0.0167622
legumain	NM_001008530	2.54	Down	6.05398e-06		2.38	Down	0.000544974
carboxylesterase 1 (monocyte/macrophage serine esterase 1)	NM_001025195	2.36	Down	1.88748e-06		2.01	Down	7.6319e-05
chymotrypsinogen B2	NM_001025200	2.16	Down	1.28846e-06		2.02	Down	9.00761e-07
RAB15 effector protein	NM_001029874	2.67	Down	9.49133e-06		2.33	Down	9.00761e-07
ectonucleoside triphosphate diphosphohydrolase 8	NM_001033113	2.6	Down	2.19279e-06		2.78	Down	6.31961e-07
proopiomelanocortin	NM_001035256	2.74	Up	1.15527e-06		2.32	Up	2.09095e-05
collagen, type XXVIII, alpha 1	NM_001037763	2.26	Down	1.70551e-05		2.04	Down	0.000620966
HEPACAM family member 2	NM_001039372	2.29	Down	0.000149791		2.03	Down	6.5424e-05
ribosomal protein S4, Y-linked 2	NM_001039567	29.65	Up	0.0084077		42.65	Up	0.0183622
myosin, heavy chain 11, smooth muscle	NM_001040113	2.36	Down	1.45535e-06		2.93	Down	4.08352e-05
activating transcription factor 3	NM_001040619	2.56	Down	1.27738e-05		2.69	Down	0.0200721
KIAA0895-like	NM_001040715	2.67	Down	2.59775e-05		2.16	Down	0.000140524
somatostatin	NM_001048	2.07	Down	9.00043e-05		3.62	Down	0.000477604
KIAA1881	NM_001080400	2.1	Down	0.000789436		3.72	Down	0.000186918
aldo-keto reductase family 1, member B10 (aldose reductase);	NM_001080538	2.21	Down	0.000399484		2.11	Up	4.08352e-05
aldo-keto reductase family 1, member B10-like
surfactant protein A2; surfactant protein A2B	NM_001098668	3.13	Down	4.46979e-07		2.47	Down	1.63616e-06
family with sequence similarity 72, member D; family with	NM_001123168	2.67	Up	0.000564745		2.37	Up	0.00237103
sequence similarity 72, member A
actin binding LIM protein family, member 2	NM_001130083	2.08	Down	0.00121954		2.22	Down	6.03295e-06
neural precursor cell expressed, developmentally	NM_001144967	2	Down	1.95284e-05		2.01	Down	1.63616e-06
down-regulated 4-like
PP12104	NM_001162995	4.28	Down	2.56011e-06		2.24	Down	0.0026605
mucin 12, cell surface associated; similar to mucin 11	NM_001164462	3.03	Down	3.40784e-06		2.68	Down	0.00167334
Similar to LOC166075	NM_001168214	2.38	Down	3.47159e-05		2.18	Down	0.000186918
chromogranin A (parathyroid secretory protein 1)	NM_001275	2.23	Down	8.20768e-06		2.52	Down	4.08352e-05
actin, alpha 2, smooth muscle, aorta	NM_001613	2.35	Down	6.05398e-06		2.72	Down	4.08352e-05
actin, gamma 2, smooth muscle, enteric	NM_001615	2.73	Down	1.10509e-05		2.09	Down	0.0260101
arylsulfatase D	NM_001669	2.35	Down	3.40784e-06		2.61	Down	2.58093e-07
cadherin 3, type 1, P-cadherin (placental)	NM_001793	2.76	Up	7.01932e-06		2.02	Up	0.00411893
hyaluronan and proteoglycan link protein 1	NM_001884	4.14	Down	1.64856e-06		2.09	Down	0.00131014
keratin 81	NM_002281	2.74	Down	1.45535e-06		2.39	Down	1.04309e-05
lysosomal-associated membrane protein 2	NM_002294	2.24	Down	4.54425e-06		2.3	Down	3.98882e-07
low density lipoprotein receptor-related protein 4	NM_002334	2.7	Down	7.01932e-06		2.27	Down	0.000140524
leukocyte receptor tyrosine kinase	NM_002344	2.19	Down	3.40784e-06		2.07	Down	6.03295e-06
secretoglobin, family 2A, member 1	NM_002407	5.25	Down	3.63607e-07		4.34	Down	6.31961e-07
NK2 homeobox 2	NM_002509	2.28	Down	2.59775e-05		3.81	Down	3.4675e-05
neuronal pentraxin I	NM_002522	2.19	Up	0.0151563		2.27	Down	0.00296414
pyruvate dehydrogenase kinase, isozyme 2	NM_002611	2.18	Down	1.48443e-05		2.12	Down	1.11273e-06
pleiotrophin	NM_002825	2.45	Down	2.56011e-06		2.88	Down	8.76458e-06
protein tyrosine phosphatase, receptor type, N polypeptide 2	NM_002847	2.4	Down	1.45535e-06		3.13	Down	1.60814e-07
RAB3B, member RAS oncogene family	NM_002867	2.03	Down	0.000149791		3.19	Down	8.90038e-05
chemokine (C-C motif) ligand 17	NM_002987	2.28	Up	2.59775e-05		5.2	Up	1.26274e-05
chemokine (C-X-C motif) ligand 5	NM_002994	2.19	Down	0.0084077		2.04	Down	0.000186918
tryptase alpha/beta 1; tryptase beta 2	NM_003294	2.21	Down	0.000246827		2.64	Down	0.000162182
vasoactive intestinal peptide	NM_003381	3.35	Down	4.54425e-06		2.89	Down	0.000417749
zinc finger protein, Y-linked	NM_003411	5.08	Up	0.0327001		5.45	Up	0.0183622
secretogranin II (chromogranin C)	NM_003469	2.76	Down	9.49133e-06		2.57	Down	0.000477604
zinc finger protein 282	NM_003575	2.06	Down	7.01932e-06		2.18	Down	5.59592e-05
breast carcinoma amplified sequence 1	NM_003657	3.45	Down	8.74055e-07		2.2	Down	5.02437e-06
BAI1-associated protein 3	NM_003933	2.18	Down	3.47159e-05		2.95	Down	1.11273e-06
retinol binding protein 2, cellular	NM_004164	2.24	Down	7.86216e-05		2.58	Down	0.00102393
kinesin family member 1A	NM_004321	2.96	Down	1.45535e-06		4.67	Down	2.38989e-06
tetraspanin 7	NM_004615	2.28	Down	1.95284e-05		2.23	Down	5.59592e-05
vasoactive intestinal peptide receptor 1	NM_004624	2.71	Down	1.64856e-06		2.29	Down	5.02437e-06
patatin-like phospholipase domain containing 4	NM_004650	2.73	Down	4.9289e-07		2.78	Down	9.68647e-08
lysine (K)-specific demethylase 5D	NM_004653	3.71	Up	0.0282156		2.98	Up	0.0153146
variable charge, Y-linked 1B; variable charge, Y-linked	NM_004679	2.19	Down	8.20768e-06		2.31	Down	9.00761e-07
SPARC-like 1 (hevin)	NM_004684	2.11	Down	1.45535e-06		2.21	Down	8.90038e-05
histone cluster 1, H1d	NM_005320	2.12	Up	7.01932e-06		2.55	Up	9.00761e-07
histone cluster 1, H1a	NM_005325	5.33	Up	3.01093e-05		2.83	Up	0.0127006
insulin-like 5	NM_005478	2.2	Down	0.022501		28.45	Down	0.000214722
tetraspanin 2	NM_005725	2.13	Down	0.000878867		2.23	Down	0.000801686
T-box 10	NM_005995	2.61	Down	1.70551e-05		2.14	Down	0.00148124
nicotinamide N-methyltransferase	NM_006169	2.02	Up	5.23882e-05		2.76	Up	6.5424e-05
neurotensin	NM_006183	5.71	Down	7.83857e-07		2.05	Down	0.0026605
6-phosphofructo-2-kinase/fructose-2,6-biphosphatase 2	NM_006212	2.25	Down	1.45535e-06		2.08	Down	1.11273e-06
peripherin	NM_006262	2.67	Down	7.01932e-06		2.53	Down	2.9079e-05
transforming, acidic coiled-coil containing protein 3	NM_006342	2.1	Up	5.23882e-05		2.41	Up	6.03295e-06
ubiquitin D	NM_006398	2.07	Up	0.00644416		2.22	Up	0.0183622
melanoma inhibitory activity	NM_006533	2.09	Up	0.000450536		2.02	Down	0.00296414
insulin-like growth factor 2 mRNA binding protein 1	NM_006546	4.28	Up	1.64856e-06		14.18	Up	1.29153e-07
WNK lysine deficient protein kinase 2	NM_006648	2.17	Down	3.40784e-06		2.12	Down	8.76458e-06
retinol binding protein 4, plasma	NM_006744	2.93	Down	0.000504069		2.48	Down	0.0115328
secretagogin, EF-hand calcium binding protein	NM_006998	2.54	Down	1.70551e-05		3.69	Down	1.48798e-05
tryptase delta 1	NM_012217	2.24	Down	0.000315954		2.55	Down	0.000120936
PDZ domain containing ring finger 4	NM_013377	2.12	Up	0.017808		2.89	Down	0.00131014
V-set and immunoglobulin domain containing 2	NM_014312	2.47	Down	2.24435e-05		2.88	Down	9.00761e-07
DNA segment on chr 4 (unique) 234 expressed sequence	NM_014392	3.27	Down	1.79449e-07		2.38	Down	1.26274e-05
LIM homeobox 3	NM_014564	2.68	Down	5.4262e-07		2.18	Down	2.38989e-06
KIAA0644 gene product	NM_014817	3.67	Down	3.63607e-07		4.2	Down	1.63616e-06
ATPase, Ca++ transporting, type 2C, member 2	NM_014861	2.16	Down	1.88748e-06		2.03	Down	8.90038e-05
pleckstrin homology domain containing, family A member 6	NM_014935	2.7	Down	4.9289e-07		2.73	Down	2.14373e-07
pleckstrin homology-like domain, family B, member 1	NM_015157	2.14	Down	4.46979e-07		2.36	Down	2.58093e-07
vacuolar protein sorting 13 homolog D (S. cerevisiae)	NM_015378	2.01	Down	7.37938e-07		2.1	Down	3.28143e-07
sclerostin domain containing 1	NM_015464	2.75	Down	3.98058e-05		2.7	Down	6.5424e-05
peptidase inhibitor 15	NM_015886	2.62	Down	0.00369831		3.83	Down	0.00296414
family with sequence similarity 8, member A1	NM_016255	2.1	Down	7.83857e-07		2.77	Down	3.28143e-07
prenylcysteine oxidase 1	NM_016297	2.06	Down	6.05398e-06		2.24	Down	1.60814e-07
protocadherin 12	NM_016580	2.01	Down	3.47159e-05		2.14	Down	0.00211152
tumor necrosis factor receptor superfamily, member 12A	NM_016639	2.07	Down	4.58441e-05		2.94	Up	0.00211152
intelectin 1 (galactofuranose binding)	NM_017625	3.49	Down	4.54425e-06		2.1	Down	0.000323801
sema domain, immunoglobulin domain (Ig), transmembrane	NM_017893	2.29	Down	1.28846e-06		2.04	Down	1.99618e-06
domain (TM) and short cytoplasmic domain, (semaphorin) 4G
transmembrane protein 144	NM_018342	3.08	Down	1.15527e-06		2.11	Down	4.35891e-08
lysine (K)-specific demethylase 3A	NM_018433	2.06	Down	7.05751e-07		2.21	Down	6.03295e-06
cytokine-like 1	NM_018659	2.03	Down	3.98058e-05		2.83	Down	4.08352e-05
SV2 related protein homolog (rat)	NM_018711	2.32	Down	3.98058e-05		3.26	Down	1.63616e-06
protocadherin beta 10; protocadherin beta 9	NM_018930	2.72	Down	7.01932e-06		2.44	Down	0.000801686
protocadherin beta 14	NM_018934	2.15	Down	6.05398e-06		2.92	Down	9.00761e-07
homeobox A10	NM_018951	2.06	Down	2.19279e-06		2	Down	1.29153e-07
chromosome 15 open reading frame 17	NM_020447	2.01	Down	0.000149791		2.78	Down	5.02437e-06
reticulocalbin 3, EF-hand calcium binding domain	NM_020650	2.24	Down	6.05398e-06		2.17	Down	0.000417749
KIAA1324	NM_020775	2.18	Down	2.19279e-06		2.2	Down	6.03295e-06
left-right determination factor 1	NM_020997	3.42	Down	2.24435e-05		3.26	Down	1.48798e-05
calcium channel, voltage-dependent, T type, alpha 1H subunit	NM_021098	2.01	Down	1.64856e-06		2.13	Down	0.000620966
WAP four-disulfide core domain 1	NM_021197	2.85	Down	1.79449e-07		2.83	Down	2.38989e-06
egl nine homolog 3 (C. elegans)	NM_022073	2.79	Down	5.22746e-06		2.41	Down	0.000103632
claspin homolog (Xenopus laevis)	NM_022111	2.01	Up	0.000192749		2.93	Up	2.38989e-06
chromosome 4 open reading frame 31	NM_024574	2.07	Down	0.000149791		2.24	Down	2.9079e-05
NOL1/NOP2/Sun domain family, member 7	NM_024677	2.15	Down	1.70551e-05		2.01	Down	4.179e-06
thrombospondin, type I, domain containing 4	NM_024817	2.42	Down	5.22746e-06		2.37	Down	1.63616e-06
phospholipase B domain containing 1	NM_024829	2.22	Down	2.93889e-06		2.44	Down	1.99618e-06
carboxylesterase 3	NM_024922	2.57	Down	3.63607e-07		2.35	Down	1.26274e-05
phosphatidylinositol glycan anchor biosynthesis, class Z	NM_025163	2.64	Down	0.000246827		3.45	Down	8.76458e-06
tripartite motif-containing 45	NM_025188	2.19	Down	3.40784e-06		2.48	Down	2.58093e-07
coiled-coil domain containing 3	NM_031455	2.15	Down	3.40784e-06		2.27	Down	0.000282865
germ cell associated 2 (haspin)	NM_031965	2.24	Up	1.95284e-05		3.97	Up	2.58093e-07
SLIT and NTRK-like family, member 6	NM_032229	2.98	Down	8.74055e-07		2.78	Down	5.59592e-05
resistin like beta	NM_032579	2.21	Down	0.00228594		2.59	Down	0.00167334
CDC14 cell division cycle 14 homolog B (S. cerevisiae)	NM_033331	2.59	Down	4.9289e-07		2.13	Down	1.48798e-05
ribosomal protein L39-like	NM_052969	2.09	Up	3.01093e-05		2.12	Up	0.000103632
von Willebrand factor A domain containing 5B2	NM_138345	2.11	Down	2.56011e-06		2.58	Down	0.000162182
BCL2-like 14 (apoptosis facilitator)	NM_138722	2.84	Down	4.46979e-07		2.37	Down	1.29153e-07
sperm flagellar 2	NM_144722	2.11	Down	2.24435e-05		2.1	Down	5.59592e-05
fibronectin type III and ankyrin repeat domains 1	NM_145235	2.21	Down	7.83857e-07		2.34	Down	7.72394e-07
activin A receptor, type IC	NM_145259	2.61	Down	5.23882e-05		2.44	Down	3.49754e-06
ring finger protein 185	NM_152267	2.09	Down	4.9289e-07		2.03	Down	9.00761e-07
ubiquitin specific peptidase 54	NM_152586	2.11	Down	1.28846e-06		2.15	Down	1.29153e-07
tudor domain containing 9	NM_153046	2.52	Up	0.00021856		2.27	Up	0.0260101
K+ voltage-gated channel, KQT-like subfamily, member 2	NM_172109	2.22	Down	7.05751e-07		2.07	Down	1.11273e-06
interleukin 4 induced 1	NM_172374	2.38	Up	3.98058e-05		2.2	Up	0.00187995
chromosome 11 open reading frame 35	NM_173573	2.14	Down	2.19279e-06		2.26	Down	2.38989e-06
nudix (nucleoside diphosphate linked moiety X)-type motif 14	NM_177533	2.54	Down	9.49133e-06		2.07	Down	3.4675e-05
chromosome 17 open reading frame 55	NM_178519	2.17	Down	4.54425e-06		2.09	Down	4.179e-06
myosin, light chain 9, regulatory	NM_181526	2.4	Down	3.97144e-06		2.98	Down	6.5424e-05
bone morphogenetic protein 8a	NM_181809	2.43	Down	4.58441e-05		2.19	Down	0.00369907
family with sequence similarity 131, member C	NM_182623	2.43	Down	1.28846e-06		2.36	Down	1.63616e-06
potassium channel tetramerisation domain containing 4	NM_198404	3.58	Down	5.22746e-06		4.1	Down	2.45993e-05
G protein-coupled receptor 56	NM_201525	2.13	Down	1.15527e-06		2.05	Down	1.36453e-06
myoglobin	NM_203377	6.33	Down	1.88748e-06		2.02	Down	0.00858301
LRRN4 C-terminal like	NM_203422	2.33	Down	7.83857e-07		2.4	Down	2.9079e-05
synaptotagmin-like 2	NM_206927	2.56	Down	7.83857e-07		2.09	Down	7.72394e-07
G protein-coupled receptor 153	NM_207370	2.49	Down	9.49133e-06		2.05	Down	0.0115328
family with sequence similarity 72, member D; family with	NM_207418	2.57	Up	0.000101573		2.3	Up	0.000140524
sequence similarity 72, member A
MHC, class II, DR beta 6 (pseudogene)	NR_001298	5.1	Down	0.00251618		3.97	Down	0.00369907
arginine-fifty homeobox pseudogene 2	NR_002222	2.11	Down	2.93889e-06		2.07	Down	0.0026605
small nucleolar RNA, H/ACA box 28	NR_002964	2.31	Down	0.000149791		2.69	Down	0.000186918
maternally expressed 3 (non-protein coding)	NR_003531	2.44	Down	9.49133e-06		2.5	Down	0.000367888
hypothetical LOC253039	NR_024408	2.18	Down	0.000878867		2.88	Down	0.000245179
hypothetical protein FLJ23867	NR_026900	2.3	Down	3.97144e-06		2.08	Down	2.38989e-06
non-protein coding RNA 114	NR_027066	2.3	Down	0.000980159		2.76	Up	0.000162182
hypothetical LOC100128096	XR_038688	2.02	Up	0.00916059		2.07	Up	0.00411893
similar to ankyrin repeat domain 20 family, member A2	XR_042306	2.41	Down	0.00277563		2.71	Down	0.000140524
